# Supplementary material for: Large antibiotic molecule diffusion in confined mesoporous silica with controlled morphology
Source: Royal Society of Chemistry journal article supplement (doi:10.1039/b805395b), 2008-01-01
Supplement: b805395b.pdf [file b805395b.pdf]

**Supplementary Information related to:**

**“Large antibiotic molecule diffusion in confined mesoporous silica with controlled morphology”**

Valentina Cauda, Barbara Onida, Barbara Platschek, Lea Mühlstein and Thomas Bein

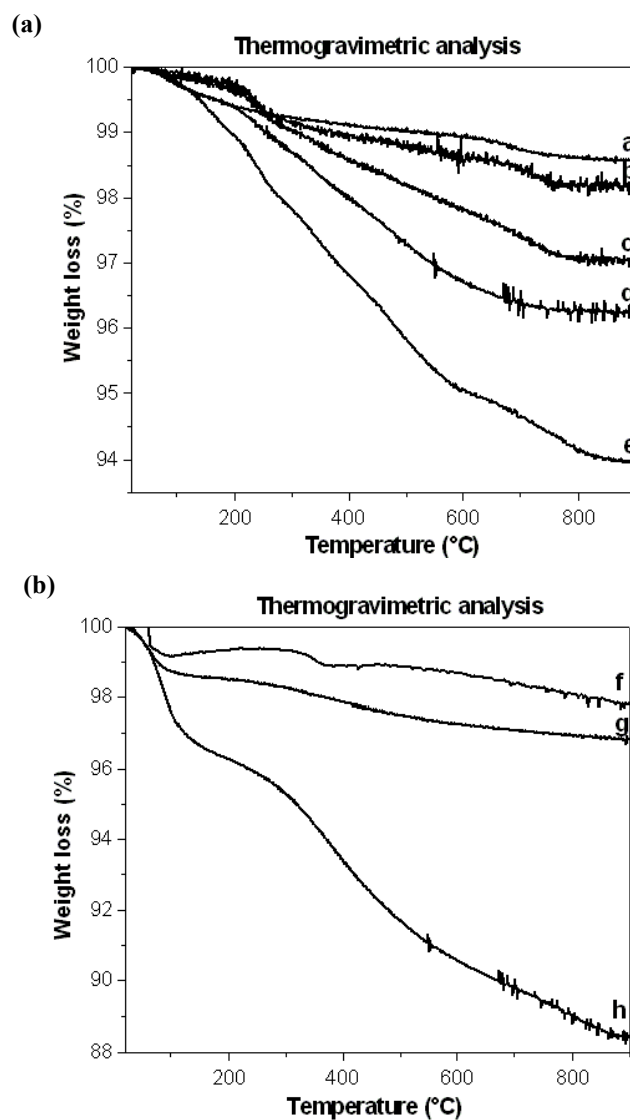

**Figure S-1:** Thermogravimetric analysis of the samples before and after the VAN uptake. (a) Calcined L-COL-P123; (b) empty anodisc AAM-VAN; (c) CIRC-P123-VAN (d) COL-CTAB-VAN; (e) L-COL-P123-VAN; (f) Calcined SBA-15 micro-spheres; (g) SBA-fibers-VAN; (h) SBA-15 spheres-VAN.

|                       | mg/g   |        |       |       |      |      |      |
|-----------------------|--------|--------|-------|-------|------|------|------|
|                       | Al     | Si     | Na    | P     | K    | Mg   | Ca   |
| <b>COL-CTAB</b>       | 309,15 | 37,86  | 8,22  | 12,55 | 0,35 | 0,20 | 0,57 |
| <b>CIRC-P123</b>      | 325,90 | 19,93  | 4,44  | 21,77 | 0,18 | 0,06 | 0,09 |
| <b>L-COL-P123</b>     | 350,25 | 35,40  | 12,71 | 4,35  | 0,57 | 0,09 | 0,15 |
| <b>SBA-15 Fibers</b>  | -      | 309,20 | 44,72 | 0,95  | 1,43 | 0,59 | 1,42 |
| <b>SBA-15 Spheres</b> | -      | 336,05 | 24,27 | 0,61  | 0,55 | 0,34 | 0,99 |

**Table S-1:** ICP elemental analysis on samples after 24 h of immersion in SBF without vancomycin. Fe was found in very small amount as an impurity.

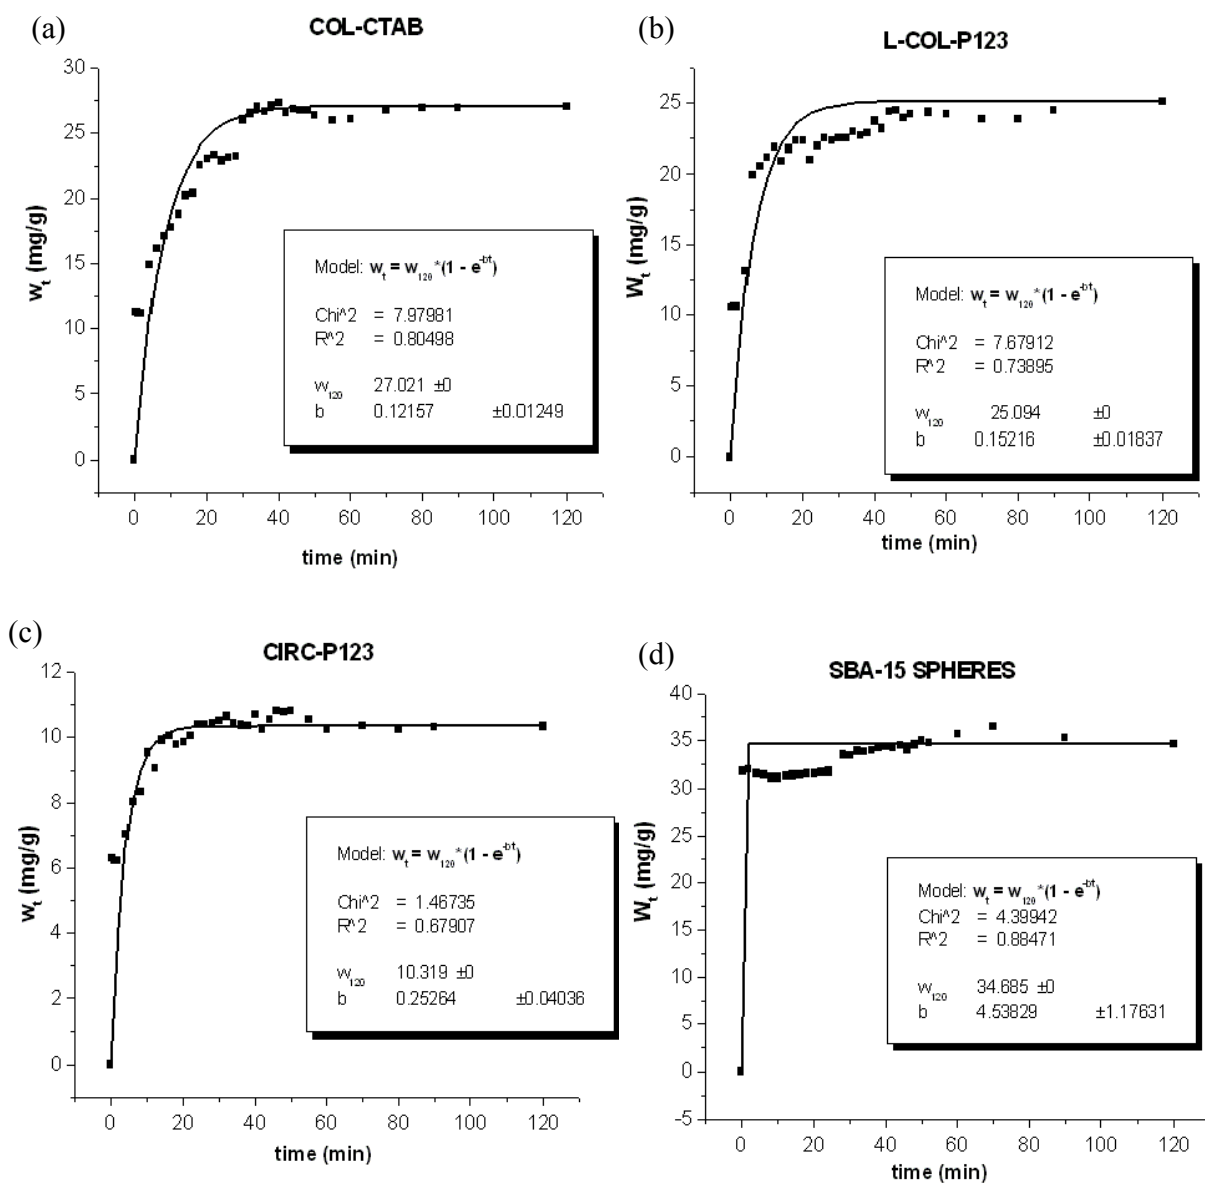

**Figure S-2:** The exponential decay fitting of the four delivery profiles from: (a) COL-CTAB; (b) L-COL-P123; (c) CIRC-P123; (d) SBA-15 micro-spheres. The equation used and the obtained parameters are indicated in the insets (see also Table 4 in the article text).
